# 1 **Benefits of natural habitat particularly woodland on** 2 **children's cognition and mental health**

3 Mikaël J. A. Maes<sup>1,2,3,4,\*</sup>, Monica Pirani<sup>3</sup>, Elizabeth R. Booth<sup>5</sup>, Chen Shen<sup>3</sup>, Ben  
4 Milligan<sup>6,7</sup>, Kate E. Jones<sup>2,\*</sup> and Mireille B. Toledano<sup>3,4,\*</sup>

5 <sup>1</sup>Department of Geography, University College London, Pearson Building, Gower  
6 Street, London, WC1E 6BT, United Kingdom.

7 <sup>2</sup>Centre for Biodiversity and Environment Research, Department of Genetics,  
8 Evolution and Environment, University College London, Gower Street, London,  
9 WC1E 6BT, United Kingdom.

10 <sup>3</sup>MRC Centre for Environment and Health, School of Public Health, Faculty of  
11 Medicine, Imperial College London, Norfolk Place, London W2 1PG, United Kingdom

12 <sup>4</sup>Mohn Centre for Children's Health and Wellbeing, School of Public Health, Faculty  
13 of Medicine, Imperial College London, Norfolk Place, London W2 1PG, United  
14 Kingdom.

15 <sup>5</sup>Centre for Educational Neuroscience, Department of Psychological Sciences,  
16 Birkbeck College, Malet Street, London, WC1E 7HX, United Kingdom

17 <sup>6</sup>Institute for Sustainable Resources, University College London, Central House,  
18 14 Upper Woburn Place, London, WC1H 0NN, United Kingdom

19 <sup>7</sup>University of New South Wales Law School, Law Building, UNSW Sydney, NSW  
20 2052, Australia

21 \*Correspondence should be addressed to M. J. A. M. ([mikael.maes.16@ucl.ac.uk](mailto:mikael.maes.16@ucl.ac.uk)),  
22 K. E. J. ([kate.e.jones@ucl.ac.uk](mailto:kate.e.jones@ucl.ac.uk)) or M. B. T. ([m.toledano@imperial.ac.uk](mailto:m.toledano@imperial.ac.uk)).

## 23 ABSTRACT

24 Life in urban areas is associated with adverse human health effects, including risks  
25 of developing cognitive problems and mental health issues. Many epidemiological  
26 studies have established associations between urban nature, cognitive development  
27 and mental health, but why specifically we receive these health benefits remains  
28 unclear, especially in children. Here, we used longitudinal data in a cohort of 3,568  
29 children aged 9 to 15 years at 31 schools across London to develop a model and  
30 examine the associations between natural habitat type, and children's cognitive  
31 development and mental health. We show that, after adjusting for other  
32 environmental, demographic and socioeconomic variables, higher daily exposure  
33 rates to natural habitat and particularly woodland were associated with enhanced  
34 cognitive development and mental health from late childhood to early adolescence.  
35 Our results suggest that optimising ecosystem services linked to cognitive  
36 development and mental health benefits should prioritise the type of natural habitat  
37 for sustainable urban planning decisions.

## 38 INTRODUCTION

39 Over 55% of the human population is now living in cities, with an estimated 2.5 billion  
40 more people to be added to the urban population by 2050<sup>1</sup>. Although urban  
41 populations often have better socioeconomic livelihoods, living in urban areas is  
42 associated with a number of adverse human health effects<sup>2</sup>. In particular,  
43 urbanisation is associated with risks of developing cognitive problems and mental  
44 health issues<sup>3,4</sup>, and is linked with various demographic and socioeconomic  
45 factors<sup>5,6</sup>. The COVID-19 pandemic has further exacerbated mental health problems  
46 such as stress, anxiety and depressive symptoms, amongst others<sup>7,8</sup>. In London, for  
47 example, an estimated 1 in 4 individuals will experience a diagnosable mental health  
48 condition in any given year, costing £26 billion annually through poorer education,  
49 employment and quality of life, affecting London's economy, population and  
50 infrastructure<sup>9</sup>. The renewed focus on cognition and mental health due to the  
51 negative effects of the COVID-19 pandemic highlight the importance to understand  
52 the mechanisms and dynamic interactions attributed to a higher risk of cognitive  
53 problems and mental health issues in urban areas, which until now remain unclear.

54 Emerging evidence suggests that surrounding environments, particularly exposure to  
55 natural areas plays an important role in cognitive development and mental health<sup>10–</sup>  
56 <sup>12</sup>, and are part of a range of ecosystem services (ES) characterised to impact  
57 human health and well-being<sup>13</sup>. Relative risk estimates of the association between  
58 natural areas and cognitive development and mental health have been comparable  
59 in magnitude to family history and parental age, and higher than the degree of  
60 urbanisation<sup>11</sup>. However, these associations lack a mechanistic understanding<sup>14</sup>.

61 Sensory and non-sensory pathways have been suggested as potentially important to  
62 deliver health benefits received from nature<sup>14</sup>. Although humans are multisensory,  
63 previous studies have primarily focused on the visual sense in humans<sup>15,16</sup>.  
64 However, natural sounds and smells, for example, are preferred over anthropogenic  
65 ones<sup>17,18</sup>, suggesting that non-visual psychological pathways are also important.  
66 Health benefits received from inhalation or ingestion of phytoncides, negative air ions  
67 or microbes may well explain other non-sensory physiological pathways through  
68 which health benefits are received from nature<sup>19,20</sup>. Further research into sensory  
69 and non-sensory pathways might prove fundamentally important to establish a  
70 mechanistic pathway between nature and mental health.

71 One of the barriers to understanding the mechanistic relationships between nature,  
72 cognitive development and mental health is the use of inconsistent exposure  
73 definitions in previous studies. Nature exposure has been measured, amongst  
74 others, as physical access to nature<sup>21</sup>, natural habitat type<sup>22,23</sup>, nature dose<sup>24</sup> and  
75 degree of urbanisation<sup>11,24</sup>. Wider-scale epidemiological research studying the  
76 association between nature and mental health has almost exclusively measured  
77 'greenness' through vegetation indices such as the Normalized Difference  
78 Vegetation Index (NDVI), a unit-less index of relative overall vegetation density and  
79 quality<sup>10-12,25</sup>. However, this tends to simplify 'greenness' without taking into account  
80 the types of natural habitat that exist. For example, standing and flowing water  
81 bodies such as lakes, rivers or reservoirs (hereinafter called blue space), are often  
82 excluded from nature and mental health research<sup>10,11,26</sup>, and when included, show  
83 significant associations with mental health and cognitive development<sup>25,27</sup>. In  
84 addition, forest has been proposed to generate a more restorative effect both

85 psychologically<sup>23,26</sup> and physiologically<sup>19</sup>. For example, studies have shown that  
86 forests have a more restorative effect when compared with overall urban green  
87 space, agricultural land or wetland, amongst others<sup>23,26</sup>. Although many of these  
88 measures to assess environmental exposure have found associations with mental  
89 health or cognitive development, to date there is no comprehensive analysis or  
90 agreement which measure of environmental exposure is more or less important. A  
91 more nuanced understanding of these patterns would help to better understand the  
92 mechanisms behind such associations.

93 Many previous studies have also often focused on adult assessment of a variety of  
94 environmental exposures in relation to mental health and cognitive development<sup>28</sup>.  
95 However, there is growing recognition of the importance of children's cognitive  
96 development and mental health, who are in the midst of their cognitive and mental  
97 development, affecting the child, its family and the broader community<sup>29</sup>. In fact, 1 in  
98 10 of London's children (~111,600 children) between the ages of 5 and 16 suffer  
99 from a clinical mental health illness, and excess costs of mental health problems in  
100 children are estimated between £11,030 and £59,130 annually for each child<sup>29</sup>. As  
101 for adults, there is also evidence that surrounding nature plays an important role in  
102 children's cognitive development and mental health into adulthood<sup>11,12,25</sup>. However, it  
103 remains unclear if the type of natural habitat influences the relationship with  
104 children's cognitive development and mental health, nor what the relative impact of  
105 surrounding nature is with regards to other risk factors.

106 In this study, we develop a set of models estimating the contribution of urban natural  
107 habitat types to children's cognitive development and mental health and argue these

108 can be used to inform future urban planning decisions. Our models demonstrated  
109 that urban natural habitat and particularly woodland habitat mitigate cognitive  
110 problems and mental health issues in children from late childhood to early  
111 adolescence. We focused our analysis on a longitudinal dataset of 3,568 children  
112 from the Study of Cognition, Adolescents and Mobile Phones (SCAMP) across the  
113 London metropolitan area in the United Kingdom (Fig. 1a) (see Methods). We  
114 assessed cognitive development through a composite executive function (EF) score  
115 using computerised tests (Fig. 1b), while we assessed mental health through self-  
116 reported questionnaires on emotional and behavioural problems using the Strength  
117 and Difficulties Questionnaire (SDQ) total difficulties score (Fig. 1c), and overall well-  
118 being using the KIDSCREEN-10 Questionnaire Health-Related Quality of Life  
119 (HRQoL) score (Fig. 1d). We systematically mapped urban natural habitat to identify  
120 each child's daily exposure rate (DER) around their home and school within 50 m,  
121 100 m, 250 m and 500 m in a three-tier stepwise characterisation of urban natural  
122 habitat: (1) natural space, (2) green and blue space, and (3) grassland and  
123 woodland. Our models identified an important risk factor for children's cognitive  
124 development and mental health and we suggest that this assists urban planners and  
125 decision-makers to sustainably manage urban nature. Unless stated otherwise, our  
126 results were based on fully adjusted models with natural habitat DERs with a  
127 daytime weighting and measured in buffer areas of 250 m (see Methods).

## 128 RESULTS

129 **Influence of urban natural habitat types for cognition and mental health.** We  
130 estimated the change in children's cognitive development and mental health for each

131 type of urban natural habitat by fitting our longitudinal models (Supplementary  
132 Methods 1). We found that children's cognitive development did improve with higher  
133 DER to natural space. A difference of one in natural space DER corresponded to an  
134 expected positive difference of 0.03 (95% credible interval [CI]: 0.01, 0.06) points in  
135 the child's cognitive development using the EF score when controlling for other  
136 demographic, environmental and socio-economic fixed effects (Fig. 2a and  
137 Supplementary Figure 1a). We also provide the results for our mental health  
138 outcomes with natural space DER (Fig. 2b,c and Supplementary Figure 1b,c), where  
139 we found no improvement of mental health with higher DER to natural space,  
140 meaning the 95% CI included the null effect for both models. Our results for the tier 2  
141 models, where both green and blue space was used for the natural habitat  
142 characterisation were almost identical to our tier 1 models for natural space DER.  
143 This is probably due to a high collinearity between our DER for natural space and  
144 green space (Supplementary Table 1) as children's DER to blue space was low. This  
145 also meant that our models did not find an improvement of children's cognitive  
146 development and mental health with DER of blue space (Fig. 2 and Supplementary  
147 Figure 2).

148 To further assess the role of different types of urban natural habitat to children's  
149 cognitive development and mental health, we characterised green space into two  
150 distinctive natural habitat types, i.e. grassland and woodland. We found that  
151 children's cognitive development and mental health did improve with higher DER to  
152 woodland. When all other risk factors were held constant, there was a beneficial  
153 contribution to cognitive development by 0.42 (95% CI: 0.21, 0.57) points using the  
154 EF score and a reduction in the risk of emotional and behavioural problems by -0.17

155 (95% CI: -0.32, -0.03) points using the SDQ total difficulties score (Fig. 2 and  
156 Supplementary Figure 3). We found no improvement of overall well-being with higher  
157 DER to woodland (Fig. 2c and Supplementary Figure 3c). When comparing those  
158 children exposed to the highest level of woodland (~38%) to those exposed to the  
159 lowest level of woodland (0%) in our study, we estimated a percent change in  
160 cognitive development of 6.83% (95% CI: 3.41, 9.11) using the EF score, and a  
161 percent change in the risk of emotional and behavioural problems of -16.36% (95%  
162 CI: -27.49, -3.50) using the SDQ total difficulties score. We found no improvement of  
163 children's cognitive development and mental health with a higher DER to grassland  
164 with the exception of our outcome for overall well-being using the HRQoL score (Fig.  
165 2 and Supplementary Figure 3).

166 **The role of other risk factors for cognition and mental health.** We fitted our  
167 longitudinal models with a number of other risk factors to account for demographic,  
168 environmental and socio-economic factors that are known to influence children's  
169 cognitive development and mental health <sup>5,6</sup>. We found that our outcomes for  
170 children's cognitive development and mental health were influenced by the child's  
171 age, ethnic background, gender, parental occupation and type of school  
172 (Supplementary Table 2,3,4). When compared to independent schools for example,  
173 state schools were predicted to result in a negative contribution to children's  
174 cognitive development and mental health by a percent change decrease of -5.10%  
175 (95% CI: -6.05, -4.30) using the EF score, a 10% (95% CI: 5, 15) increase in the risk  
176 of emotional and behavioural problems using the SDQ total difficulties score, and an  
177 increase in odds of exhibiting low overall well-being by 57% using the HRQoL score  
178 (95% CI: 19, 104). In addition to this, we found that air pollution influenced children's



179 cognitive development in most of our models (Supplementary Table 2). When  
180 removing demographic, environmental, and socio-economic factors from our models,  
181 we showed that modelled environmental variables were, in general, tenfold smaller  
182 than the contribution of our demographic and socio-economic variables  
183 (Supplementary Table 5). This stepwise exclusion of fixed effects from our models  
184 highlights the relative importance of our demographic and socio-economic variables  
185 to children's cognitive development and mental health.

186 To test the robustness of our findings, we did a series of sensitivity analyses to  
187 assess which models perform best for evaluating the association between children's  
188 cognitive development and mental health, and types of urban natural habitat. This  
189 included testing each child's DER for (i) different buffer areas around their home and  
190 school and (ii) a different weighting based on a full day (24 hours) instead of a  
191 daytime (12 hours) weighting (See Methods). For our analyses of different buffer  
192 areas, we found that our results were consistent across different buffer areas but  
193 some models did suggest a weaker association with smaller buffer areas when  
194 compared with larger buffer areas (Supplementary Figure 1,2,3). This suggests that  
195 exposure to natural habitats further away from their home and school may play a  
196 more important role for their cognitive development and mental health than  
197 previously hypothesised by other studies<sup>25</sup>. When using a different weighting for our  
198 DER, we found that our models showed consistent patterns when we modelled with  
199 a DER based on a daytime or full day weighting (Supplementary Table 2,3,4).

## 200 DISCUSSION

201 To our knowledge, this is the largest epidemiological study to report on the impact of  
202 natural habitat type exposure on cognitive development and mental health in children  
203 from late childhood to early adolescence. Our results showed a strong association  
204 between woodland exposure, children's cognitive development and mental health.  
205 We also found that exposure to natural space or green space was associated with a  
206 beneficial contribution to cognitive development, while there was a weaker  
207 association for our mental health outcomes. Finally, we did not find a consistent  
208 association of blue space or grassland exposure with cognitive development and  
209 mental health.

210 Overall, we observed that exposure to woodland was associated with a beneficial  
211 contribution to cognitive development and a lower risk of emotional and behavioural  
212 difficulties from late childhood to early adolescence. This is in line with previous  
213 reports of positive impacts from woodland on physical and mental health<sup>19,23,30</sup>, with  
214 the exception of a study performed in central Scotland<sup>31</sup>. Forest bathing, for  
215 example, is a relaxation therapy that has been associated with physiological  
216 benefits, supporting the human immune function, reducing heart rate variability and  
217 salivary cortisol, and psychological benefits such as reduced feelings of hostility and  
218 depression<sup>19,30</sup>. However, the hypothetical mechanisms why we experience these  
219 psychological benefits from woodland remain unknown. Higher audio-visual  
220 exposure through vegetation and animal abundance has been documented to  
221 improve mental health, of which both features are expected in higher abundance in  
222 woodland<sup>17,32</sup>. Even though our results show that urban woodland is associated with

223 children's cognitive development and mental health, the mechanistic pathway to  
224 explain this association in urban areas remains unknown.

225 Our results also showed that exposure to natural space or green space was  
226 associated with a beneficial contribution to children's cognitive development, which  
227 was consistent with previous studies<sup>12,33</sup>. For the mental health outcomes, our  
228 findings for weaker associations with exposure to natural space or green space is  
229 consistent with the variability in these relationships found in previous studies<sup>10,11,21,34</sup>.

230 One reason explaining this variability may be that most studies, including this study,  
231 do not account for the quality of green space, which has been proposed as more  
232 important than the quantity of green space<sup>35</sup>. Nevertheless, systematic reviews  
233 suggest that nature positively influences mental health; even though, evidence is  
234 often limited to cross-sectional studies, and inadequate particularly for children<sup>28</sup>.

235 We did not find a consistent association between blue space exposure, cognitive  
236 development and mental health. However, we cannot dismiss that blue space may  
237 be associated with cognitive development and mental health as other studies have  
238 found associations<sup>25,36</sup>. In our study of 3,568 children, 66.8% had no blue space  
239 within a 250 m buffer area, showing that the amount of blue space surrounding  
240 children's residence and school was low regardless. One explanation for this weak  
241 association may be the difference of natural habitat composition from one city to the  
242 other, potentially changing people's relationship with nature. Residents in coastal  
243 cities, for example, are assumed to have a different relationship with blue space  
244 compared to cities inland where blue space may be less abundant. Alternatively,  
245 inconsistencies may be the result of different sampling techniques. For example,

246 other studies have used self-reported blue space visitation rates or blue space  
247 visibility and found associations with behavioural difficulties and psychological  
248 distress<sup>25,36</sup>. Inconsistencies because of different sampling techniques make it  
249 difficult to harmonize results into a consistent framework, but to date there has been  
250 no comprehensive analysis allowing for harmonisation in green space mental health  
251 research.

252 Urban nature may have multiple benefits for human health and well-being, including  
253 changing air pollution, physical and mental health, and social well-being.  
254 Optimisation of nature by decision-makers to maximise cognitive development and  
255 mental health benefits from nature exposure may have synergies or trade-offs with  
256 other ES, especially in urban areas where space is limited. For example, our results  
257 found that higher levels of woodland were associated with enhanced cognitive  
258 development and mental health, which can be synergistic with climate mitigation  
259 efforts to sequester carbon dioxide<sup>37</sup>, but can have trade-offs with children's physical  
260 health when woodland were to replace open spaces specifically designated for  
261 physical activity<sup>38</sup>. The lack of a conceptual framework between nature, cognitive  
262 development and mental health is also a key hindrance for the inclusion of these ES  
263 in international standardised environmental frameworks such as the System of  
264 Environmental-Economic Accounting Experimental Ecosystem Accounting, nor in the  
265 revision which is currently taking place<sup>39</sup>. The complexity of interactions and lack of  
266 knowledge on ES related to cognitive and mental benefits has made it difficult to  
267 identify which decisions should be made regarding management of urban nature, a  
268 critical knowledge gap given the increase in the global urban population this  
269 century<sup>1</sup>.

270 The study has several strengths. It used a high-quality cohort dataset of  
271 considerable size for children during late childhood and early adolescence, a subset  
272 of the urban population which is often understudied. This large sample had  
273 substantial spatio-temporal diversity on an urban scale for the Greater London  
274 metropolitan area with sufficient statistical power to investigate interactions. The  
275 study used clinically validated instruments to define children's cognitive development  
276 and mental health. It also used geographical information of very high resolution to  
277 develop metrics of natural habitat DER such as NDVI at 10 m resolution and LiDAR  
278 at 2 m resolution. Previous studies have used conventional satellite remote-sensing  
279 data for establishing associations between green space, cognitive development and  
280 mental health. In this study however, we developed an objective measure of  
281 exposure to natural habitat types as a proxy for characterising different natural  
282 habitats. This study also adjusted for other potential confounders through objective  
283 measures of exposure to air pollution, socioeconomic status and other individual-  
284 level confounders.

285 Despite of our large sample size using a rigorous longitudinal study design, our  
286 results could be influenced by a number of potentially confounding factors. For  
287 example, we cannot necessarily assume that children's DER to natural space leads  
288 to increased use of natural space, as the quality of natural space could also play a  
289 role<sup>25,35</sup>. Our data also did not provide information on when exactly children moved to  
290 a new residence between baseline and follow-up, which may influence our measure  
291 of DER. Additionally, although we adjusted for individual and area-level  
292 socioeconomic status through parental occupation and the Carstairs deprivation  
293 index, unmeasured risk factors such as higher crime rates, housing prices, or fewer

294 social advantages may also influence our results<sup>40</sup>. Finally, although our study  
295 importantly sheds light on the role of natural habitat types for cognitive development  
296 and mental health, it also highlights the gap in understanding the mechanisms of the  
297 benefits of woodland over other types of natural habitat.

## 298 CONCLUSION

299 Our study showed that higher levels of woodland were associated with a beneficial  
300 contribution to cognitive development and a lower risk of emotional and behavioural  
301 problems from late childhood to early adolescence. These findings contribute to our  
302 understanding of urban natural habitats as an important risk factor for children's  
303 cognitive development and mental health. Ensuring fair and equitable access to  
304 woodland could be an important tool to manage and minimise cognitive development  
305 and mental health problems, especially in children who are in the midst of their  
306 development into adulthood. Lower access to woodland may also be an added risk  
307 factor among more vulnerable groups in society. Our findings contribute to our  
308 understanding of the physical and monetary valuation of cognitive and mental health  
309 benefits received from urban nature, suggesting that not every type of natural space  
310 may contribute equally to cognitive development and mental health benefits. As part  
311 of the growing human health green space research, our study concludes that  
312 understanding people's local relationship with nature may be a key component to  
313 understand its association with cognitive development and mental health. This  
314 should be considered as part of ongoing efforts to sustainably develop urban nature  
315 and to standardise international measurement and environmental accounting  
316 frameworks for ES connected to cognitive development and mental health benefits.

## 317 METHODS

318 **Study population.** We use data from SCAMP<sup>41</sup>, a longitudinal cohort study  
319 established to investigate how the cognitive development and behaviour of children  
320 across the London metropolitan area during late childhood and early adolescence  
321 might be affected by use of mobile phones and other technologies that use radio  
322 waves. A baseline and follow-up school visit were carried out between 2014 and  
323 2018 with a time gap of approximately 2 years between the baseline and follow-up  
324 visit for each school. Initially, 6,612 children participated to the baseline assessment,  
325 and 5,208 children participated to the follow-up. A total of 3,791 children participated  
326 to both the baseline and follow-up assessment, and for our analysis we used a  
327 subset of 3,568 children who had a known home address during the baseline and  
328 follow-up assessment (Fig. 1a). This subset excluded 8 schools due to low sampling  
329 size (< 15 children per school). Included children were on average 12 and 14.2 years  
330 old during the baseline and follow-up assessment respectively, and 57.9% of them  
331 were female. The children ( $n = 3,568$ ) were part of 31 schools across London, of  
332 which 12 were independent schools and 19 were state schools. Of the 31  
333 participating schools, 3 were located outside the Greater London Authority (GLA)  
334 administrative area (Fig. 1a). During the assessments, information was gathered on  
335 age, gender (two levels: female or male), ethnicity (five levels: White, Black, Asian,  
336 mixed or other), school type (two levels: state or independent), parental occupation  
337 (five levels: managerial/professional occupations, intermediate occupations, small  
338 employers/own account workers, lower supervisory/technical occupations or semi-  
339 routine/routine occupations)<sup>42</sup>, and area-level deprivation (divided in quintiles ranging  
340 from category 1 'least deprived' to category 5 'most deprived'). Area-level deprivation

341 was based on the Carstairs deprivation index to identify socioeconomic  
342 confounding<sup>43</sup>. The scores were standardised to the area in which the child lived and  
343 not to the child itself in order to reflect the material deprivation of the area in relation  
344 to neighbouring areas. It is measured based on four variables from the United  
345 kingdom (UK) Office of National Statistics 2011 Census: proportion of low social  
346 class, lack of car ownership, household overcrowding and male unemployment<sup>44</sup>.  
347 Further characteristics of the study population are presented in Supplementary Table  
348 6. All parents or guardians signed the informed consent and the study was approved  
349 (REC reference: 14/NW/0347) by the Health Research Authority NKES Committee  
350 North West - Haydock. Study population data are not publicly available for data  
351 protection issues. To request access to the data, contact M. B. Toledano at  
352 [m.toledano@imperial.ac.uk](mailto:m.toledano@imperial.ac.uk).

353 **Outcomes.** Children's cognitive development was assessed through the EF, a  
354 composite score of three computerised tests (i.e. Backward Digit Span [BDS],  
355 Spatial Working Memory [SWM] and Trail Making Task [TMT])<sup>45-47</sup>. EF composite  
356 was only calculated for children who completed all three contributing tasks. We  
357 derived the EF composite at baseline by taking an average of Z-scores for the key  
358 performance measure for each EF task<sup>48</sup>. The composite score at follow-up was  
359 derived by taking an average of scores for the same EF tasks, equivalently adjusted  
360 by the mean and SD from baseline performance. Z-scores and adjusted values were  
361 calculated across the whole population at each time point. TMT and SWM values  
362 were reverse coded prior to taking the average. EF values were continuous and  
363 higher EF values indicated better cognitive performance (Fig. 1b).



364 We assessed children's mental health from the self-reported SDQ and the  
365 KIDSCREEN-10 Questionnaire taken by each child<sup>49</sup>. The SDQ total difficulties  
366 score assesses the emotion and behaviour of children and was calculated by  
367 summing the scores for the four difficulties subscales on emotional problems,  
368 conduct, hyperactivity and peer problems. Each subscale comprised of five items  
369 that can be scored 0, 1 or 2 and each subscale score can therefore range from 0 to  
370 10. An SDQ total difficulties score was treated as count data where a higher value  
371 represented more behavioural difficulties (Fig. 1c)<sup>49</sup>.

372 The KIDSCREEN-10 HRQoL score consists of 10 self-reported items covering  
373 physical, psychological and social dimensions of well-being, with children indicating  
374 the frequency or severity of each item on a 5 point Likert scale (1 = never/not at all, 2  
375 = almost never/slightly, 3 = sometimes/moderately, 4 = almost always/very and 5 =  
376 always/extremely). Totals of these 10 items were summed with higher values  
377 indicating better HRQoL. Rasch person parameters were assigned to each possible  
378 total based on the Rasch model, a psychometric model commonly used for  
379 measurements of categorical data<sup>50</sup>. The Rasch-scaled single score of HRQoL was  
380 then transformed into scores with a mean of 50 and a standard deviation of  
381 approximately 10, where a higher score indicates a better HRQoL (Fig. 1d)<sup>50</sup>. In line  
382 with previous studies, binary cut-offs were applied based on the lower 10% of the  
383 sample distribution (i.e. baseline and follow-up mean below 39.28 and 36.51,  
384 respectively) to identify children with noticeably low overall well-being (two levels: 0 -  
385 high overall well-being and 1 - low overall well-being)<sup>51</sup>. All data on children's  
386 cognitive development, mental health and overall well-being were gathered using  
387 Psytools software (Delosis Ltd., London).

388 **Quantification of natural habitat composition.** Our exposure assessment of  
389 natural habitat was based on a three-tier stepwise characterisation: (1) natural  
390 space, (2) green and blue space, and (3) grassland and woodland. We used different  
391 data sources to quantify the natural habitats surrounding the residential and school  
392 area of each child. Firstly, we generated a NDVI spatial layer of our study area using  
393 data from the Sentinel-2 satellite at 10 m spatial resolution<sup>52</sup>. NDVI is a unit-less  
394 index of relative overall vegetation density and quality based on differential surface  
395 reflectance in the red and near infrared regions with low values indicating sparse  
396 vegetation, and high values indicating dense vegetation<sup>53</sup>. We generated our NDVI  
397 map by using Google Earth Engine to filter out satellite data between July 1<sup>st</sup> 2015  
398 and July 1<sup>st</sup> 2017 for images with less severe cloud cover (<5%)<sup>54</sup>. Images covering  
399 the same area at different dates were then mosaicked into a single complete and  
400 cloud-free image of NDVI (Supplementary Figure 4a). Secondly, we created a spatial  
401 layer from surface and tidal water maps from the Ordnance Survey (OS) Open Map,  
402 a large-scale digital map covering Great Britain (Supplementary Figure 4b)<sup>55</sup>.

403 To further assess fine-scale habitat composition within green space, we used Light  
404 Detection and Ranging (LiDAR) data<sup>56</sup> from the Environment Agency ([data.gov.uk](https://data.gov.uk),  
405 accessed July 2<sup>nd</sup> 2018, licensed under the Open Government Licence 3.0)  
406 (Supplementary Figure 4c). We used the LiDAR Composite Digital Surface Model  
407 and Digital Terrain Model at 2 m spatial resolution to estimate object height across  
408 our study area. Within green space, we split vegetation in two height strata: 0 - 1 m  
409 and (>1 m) and we assumed that vegetation between 0 - 1 m was predominantly  
410 grassland, and >1 m was woodland<sup>56</sup>.

411 We calculated each child's proportionate DER to each natural habitat  
412 characterisation in buffer areas of 50 m, 100 m, 250 m and 500 m around the  
413 residential and school area:

$$414 \quad DER = \frac{\left(\frac{4RER + 8SER}{12}\right)5 + 2RER}{7} \quad (1)$$

415 where DER is the daily exposure rate, RER is the residential exposure rate and SER  
416 is the school exposure rate. We assumed each child spent the weekend in their  
417 residential area, while we weighted weekdays by the daytime (12 hours) children  
418 were assumed to spend at home (4 hours) and at school (8 hours). We selected  
419 different buffer areas to assess the consistency of our results in a comparable  
420 manner with previous studies<sup>11,12,25</sup>. Based on the above formula, we calculated  
421 natural space DER by combining our NVDI and water maps. Then, we calculated  
422 green and blue space DER by using our NDVI and water maps separately. Finally,  
423 we calculated grassland and woodland DER by combining our NDVI and height  
424 strata map. The different spatial resolutions of our NDVI and height strata map  
425 resulted in classification errors where pixels were misclassified as grassland or  
426 woodland when in fact it was part of the built environment. To correct for this, we  
427 excluded buildings from these maps using the buildings feature from OS Open Map  
428 (Supplementary Figure 4d)<sup>55</sup>. It was difficult to use blue space DER of the 3,568  
429 participants because 2,383 children (66.8%) had, for example, no blue space within  
430 250 m. We therefore reclassified blue space into tertiles (three levels: level 1 - no  
431 blue space, level 2 - blue space with a DER below the mean, and level 3 - blue  
432 space with a DER above the mean).

433 **Quantification of outdoor air pollution.** Considering the ability of nature to mitigate  
434 local air pollution<sup>57</sup>, we hypothesised that exposure to air pollution could be an  
435 underlying confounder between nature exposure and cognitive development<sup>58</sup>. We  
436 based our exposure assessment of air pollution on emission estimates of key air  
437 pollutants using the London Atmospheric Emission Inventory (LAEI) 2016 from GLA  
438 and Transport for London ([data.london.gov.uk](https://data.london.gov.uk), accessed February 27<sup>th</sup> 2020,  
439 licensed under the UK Open Government Licence 2.0). The LAEI estimated ground  
440 level concentrations of four air pollutants (nitrogen dioxide [NO<sub>2</sub>], nitrogen oxides  
441 [NO<sub>x</sub>] and particulate matter with a diameter of 10 microns [PM<sub>10</sub>] or 2.5 microns or  
442 less [PM<sub>2.5</sub>]) using an atmospheric dispersion model, and covered Greater London,  
443 as well as areas outside Greater London up to the M25 motorway. A total of 3,305  
444 children (out of 3,568 children) were located within the M25 motorway and therefore  
445 eligible to measure ambient air pollution. Similar to the quantification of natural  
446 habitat composition, we calculated each child's average DER to each air pollutant in  
447 buffer areas of 50 m, 100 m, 250 m and 500 m around the residential and school  
448 area following equation 1. The Pearson's correlation coefficient among DERs ranged  
449 from 0.95 (between NO<sub>2</sub> and PM<sub>10</sub>) to 0.98 (between NO<sub>2</sub> and NO<sub>x</sub>) (Supplementary  
450 Table 7). To avoid multicollinearity, we used NO<sub>2</sub> DER as it is a commonly used  
451 proxy for traffic-related air pollution.

452 **Statistical analyses.** Our modelling framework consisted of Bayesian longitudinal  
453 regression models to examine the relationship between natural habitat DERs, and  
454 our cognitive development and mental health outcomes. Inference was performed  
455 using Integrated Nested Laplace Approximation (INLA)<sup>59</sup>. The Pearson's correlation  
456 coefficient among natural habitat DERs ranged from 0.38 (between grassland and

457 woodland) to 0.99 (between natural space and green space) (Supplementary Table  
458 1). The high Pearson's correlation coefficient was not considered a problem because  
459 we performed separated analyses for the different DERs. In particular, we developed  
460 three multilevel modelling structures including these as fixed effects, where Model I  
461 (M I) included natural space DER, Model II (M II) included green and blue space  
462 DER, and Model III (M III) included grassland and woodland DER. Our outcomes  
463 consisted of two repeated measures per child, i.e. a baseline and follow-up measure.  
464 We assumed a Gaussian, Poisson and Binomial distribution for the EF score, SDQ  
465 total difficulties score and HRQoL score, respectively. We included a random effect  
466 term for child identifier to allow for between-child variance, while we used a random  
467 effect term for tests at the time of visit (two levels: baseline or follow-up) for each  
468 child to introduce correlation among the repeated measurements. School was not  
469 added as an additional random effect in our multilevel model because it did not  
470 improve the model fit, and three different cross-validation techniques were used for  
471 model comparison and selection (Supplementary Table 8,9,10). Fully adjusted  
472 models included natural habitat DERs, age, area-level deprivation, ethnicity, gender,  
473 parental occupation and school type, and models with EF score were additionally  
474 adjusted for air pollution. Additionally, we did a stratified analysis to investigate  
475 potential changes in point estimates and avoid potential bias from over adjustment  
476 (four levels: unadjusted, adjusted for ethnicity and school type, adjusted for  
477 socioeconomic factors and adjusted for all risk factors) (Supplementary Figure  
478 1,2,3). A detailed description of the model structures is given in Supplementary  
479 Methods 1. Prior to the longitudinal analysis, a cross-sectional analysis of the  
480 baseline cohort was done which was qualitatively similar to the longitudinal results

481 and is therefore not further discussed (Supplementary Methods 2 and  
482 Supplementary Figure 5).

483 We performed the following sensitivity analyses to determine the best models for  
484 evaluating the association with natural habitat DER by fitting additional Bayesian  
485 mixed-effect models for (i) the association with different buffer areas (Supplementary  
486 Figure 1,2,3) and (ii) the association with a different weighting of natural habitat  
487 DERs based on a full day (24 hours) instead of a daytime (12 hours) weighting  
488 where we assumed children spend 16 hours at home and 8 hours at school during  
489 the weekdays (Supplementary Table 2,3,4). In the main text, unless stated  
490 otherwise, results were based on fully adjusted models with natural habitat DERs  
491 with a daytime weighting and measured in buffer areas of 250 m as we found no  
492 strong difference when measuring at different buffer areas, and between daytime or  
493 full day weighting. We did all data processing and statistics in Python 3.7.3., ArcGIS  
494 10.7 and R 4.0.0 via RStudio using the packages brinla, ggplot2, ggpubr, R-INLA,  
495 MBA, raster, rgdal, sp and spdep<sup>60</sup>.

## 496 DATA AVAILABILITY

497 Study population and environmental exposure data around each child's home and  
498 school are not publicly available for data protection issues. To request access to the  
499 data, contact M. B. Toledano at [m.toledano@imperial.ac.uk](mailto:m.toledano@imperial.ac.uk). Environmental data that  
500 are the basis for our environmental exposure data are available at  
501 [github.com/MikaelMaes/HumanExposure.git](https://github.com/MikaelMaes/HumanExposure.git). This environmental data are based on  
502 publicly available sources. Sentinel-2 satellite data are available using Google Earth  
503 Engine at [earthengine.google.com](https://earthengine.google.com). Buildings, surface water and tidal water data

504 from the OS Open Map are available at [ordnancesurvey.co.uk](http://ordnancesurvey.co.uk). LiDAR data from the  
505 Environment Agency are available at [data.gov.uk](http://data.gov.uk). Air pollution estimates using the  
506 LAEI 2016 from GLA and Transport for London are available at [data.london.gov.uk](http://data.london.gov.uk).  
507 The full model outputs that support the findings of this study are available in the  
508 Supplementary Information.

## 509 CODE AVAILABILITY

510 The source code to compute NDVI from satellite data using Google Earth Engine is  
511 available at [earthengine.google.com](http://earthengine.google.com). The code for processing raw LiDAR data,  
512 creating our environmental exposure variables and modelling our data is available at  
513 [github.com/MikaelMaes/HumanExposure.git](https://github.com/MikaelMaes/HumanExposure.git).

## 514 REFERENCES

- 515 1. UN DESA. *World Urbanization Prospects: The 2018 Revision*  
516 *(ST/ESA/SER.A/420)*. (2019).
- 517 2. Giles-Corti, B. *et al.* City planning and population health: a global challenge.  
518 *Lancet* **388**, 2912–2924 (2016).
- 519 3. Okkels, N., Kristiansen, C. B., Munk-Jørgensen, P. & Sartorius, N. Urban  
520 mental health. *Curr. Opin. Psychiatry* **31**, 258–264 (2018).
- 521 4. Robbins, R. N., Scott, T., Joska, J. A. & Gouse, H. Impact of urbanization on  
522 cognitive disorders. *Curr. Opin. Psychiatry* **32**, 210–217 (2019).
- 523 5. Afifi, M. Gender differences in mental health. *Singapore Med. J.* **48**, 385–391  
524 (2007).
- 525 6. Guhn, M., Emerson, S. D., Mahdavian, D. & Gadermann, A. M. Associations  
526 of Birth Factors and Socio-Economic Status with Indicators of Early Emotional

- 527 Development and Mental Health in Childhood: A Population-Based Linkage  
528 Study. *Child Psychiatry Hum. Dev.* **51**, 80–93 (2020).
- 529 7. Torales, J., O’Higgins, M., Castaldelli-Maia, J. M. & Ventriglio, A. The outbreak  
530 of COVID-19 coronavirus and its impact on global mental health. *Int. J. Soc.*  
531 *Psychiatry* **66**, 317–320 (2020).
- 532 8. Holmes, E. A. *et al.* Multidisciplinary research priorities for the COVID-19  
533 pandemic: a call for action for mental health science. *The Lancet Psychiatry*  
534 vol. 7 547–560 (2020).
- 535 9. GLA. *London Mental Health: The invisible costs of mental ill health.*  
536 [https://www.london.gov.uk/sites/default/files/gla\\_migrate\\_files\\_destination/Men](https://www.london.gov.uk/sites/default/files/gla_migrate_files_destination/Mental%20health%20report.pdf)  
537 [tal health report.pdf](https://www.london.gov.uk/sites/default/files/gla_migrate_files_destination/Mental%20health%20report.pdf) (2014).
- 538 10. Sarkar, C., Webster, C. & Gallacher, J. Residential greenness and prevalence  
539 of major depressive disorders: a cross-sectional, observational, associational  
540 study of 94 879 adult UK Biobank participants. *Lancet. Planet. Heal.* **2**, e162–  
541 e173 (2018).
- 542 11. Engemann, K. *et al.* Residential green space in childhood is associated with  
543 lower risk of psychiatric disorders from adolescence into adulthood. *Proc. Natl.*  
544 *Acad. Sci.* 201807504 (2019) doi:10.1073/PNAS.1807504116.
- 545 12. Dadvand, P. *et al.* Green spaces and cognitive development in primary  
546 schoolchildren. *Proc. Natl. Acad. Sci. U. S. A.* **112**, 7937–42 (2015).
- 547 13. Haines-Young, R. & Potschin, M. *Common International Classification of*  
548 *Ecosystem Services (CICES) V5.1.* (2018).
- 549 14. Franco, L. S., Shanahan, D. F. & Fuller, R. A. A Review of the Benefits of  
550 Nature Experiences: More Than Meets the Eye. *Int. J. Environ. Res. Public*



- 551            *Health* **14**, 864 (2017).
- 552    15.    Cox, D. T. C. *et al.* Skewed contributions of individual trees to indirect nature  
553            experiences. *Landsc. Urban Plan.* **185**, 28–34 (2019).
- 554    16.    Ulrich, R. View Through a Window May Influence Recovery from Surgery.  
555            *Science (80-. )*. **224**, 224–225 (1984).
- 556    17.    Irvine, K. N. *et al.* Green space, soundscape and urban sustainability: an  
557            interdisciplinary, empirical study. *Local Environ.* **14**, 155–172 (2009).
- 558    18.    Weber, S. T. & Heuberger, E. The Impact of Natural Odors on Affective States  
559            in Humans. *Chem. Senses* **33**, 441–447 (2008).
- 560    19.    Li, Q. Effect of forest bathing trips on human immune function. *Environ. Health*  
561            *Prev. Med.* **15**, 9–17 (2010).
- 562    20.    Rook, G. A., Raison, C. L. & Lowry, C. A. Can we vaccinate against  
563            depression? *Drug Discov. Today* **17**, 451–458 (2012).
- 564    21.    Markevych, I. *et al.* Access to urban green spaces and behavioural problems  
565            in children: Results from the GINIplus and LISApplus studies. *Environ. Int.* **71**,  
566            29–35 (2014).
- 567    22.    Taylor, M. S., Wheeler, B. W., White, M. P., Economou, T. & Osborne, N. J.  
568            *Research note: Urban street tree density and antidepressant prescription*  
569            *rates—A cross-sectional study in London, UK. Landscape and Urban Planning*  
570            vol. 136 (2015).
- 571    23.    Akpınar, A., Barbosa-Leiker, C. & Brooks, K. R. Does green space matter?  
572            Exploring relationships between green space type and health indicators. *Urban*  
573            *For. Urban Green.* **20**, 407–418 (2016).
- 574    24.    Cox, D. T. C., Shanahan, D. F., Hudson, H. L., Fuller, R. A. & Gaston, K. J.

- 575 The impact of urbanisation on nature dose and the implications for human  
576 health. *Landsc. Urban Plan.* **179**, 72–80 (2018).
- 577 25. Amoly, E. *et al.* Green and Blue Spaces and Behavioral Development in  
578 Barcelona Schoolchildren: The BREATHE Project. *Environ. Health Perspect.*  
579 **122**, 1351–1358 (2014).
- 580 26. Astell-Burt, T. & Feng, X. Association of Urban Green Space With Mental  
581 Health and General Health Among Adults in Australia. *JAMA Netw. Open* **2**,  
582 e198209 (2019).
- 583 27. Barton, J. & Pretty, J. What is the Best Dose of Nature and Green Exercise for  
584 Improving Mental Health ? A Multi - Study Analysis. *Environ. Sci. Technol.* **44**,  
585 3947–3955 (2010).
- 586 28. Gascon, M. *et al.* Mental health benefits of long-term exposure to residential  
587 green and blue spaces: A systematic review. *Int. J. Environ. Res. Public*  
588 *Health* **12**, 4354–4379 (2015).
- 589 29. PHE. *The mental health of children and young people in London.* (2016).
- 590 30. Morita, E. *et al.* Psychological effects of forest environments on healthy adults:  
591 Shinrin-yoku (forest-air bathing, walking) as a possible method of stress  
592 reduction. *Public Health* **121**, 54–63 (2007).
- 593 31. Thompson, C. W. Woodland improvements in deprived urban communities:  
594 how does this build resilience? *Eur. J. Public Health* **27**, (2017).
- 595 32. Hedblom, M., Heyman, E., Antonsson, H. & Gunnarsson, B. Bird song diversity  
596 influences young people’s appreciation of urban landscapes. *Urban For. Urban*  
597 *Green.* **13**, 469–474 (2014).
- 598 33. Liao, J. *et al.* Residential exposure to green space and early childhood

- 599 neurodevelopment. *Environ. Int.* **128**, 70–76 (2019).
- 600 34. Picavet, H. S. J. *et al.* Greener living environment healthier people? Exploring  
601 green space, physical activity and health in the Doetinchem Cohort Study.  
602 *Prev. Med. (Baltim)*. **89**, 7–14 (2016).
- 603 35. Francis, J., Wood, L. J., Knuiman, M. & Giles-Corti, B. Quality or quantity?  
604 Exploring the relationship between Public Open Space attributes and mental  
605 health in Perth, Western Australia. *Soc. Sci. Med.* **74**, 1570–1577 (2012).
- 606 36. Nutsford, D., Pearson, A. L., Kingham, S. & Reitsma, F. Residential exposure  
607 to visible blue space (but not green space) associated with lower psychological  
608 distress in a capital city. *Health Place* **39**, 70–78 (2016).
- 609 37. McPherson, E. G., Xiao, Q. & Aguaron, E. A new approach to quantify and  
610 map carbon stored, sequestered and emissions avoided by urban forests.  
611 *Landsc. Urban Plan.* **120**, 70–84 (2013).
- 612 38. Lachowycz, K., Jones, A. P., Page, A. S., Wheeler, B. W. & Cooper, A. R.  
613 What can global positioning systems tell us about the contribution of different  
614 types of urban greenspace to children’s physical activity? *Health Place* **18**,  
615 586–94 (2012).
- 616 39. UN. *System of Environmental-Economic Accounting - Ecosystem Accounting:*  
617 *Draft for the Global Consultation on the complete document.* (2020).
- 618 40. Tarling, R. & Roger, R. D. Socio-Economic Determinants of Crime Rates:  
619 Modelling Local Area Police-Recorded Crime. *Howard J.* **55**, 207–225 (2016).
- 620 41. Toledano, M. B. *et al.* Cohort Profile: The Study of Cognition, Adolescents and  
621 Mobile Phones (SCAMP). *Int. J. Epidemiol.* **48**, 25-261 (2018).
- 622 42. Rose, D., Pevalin, D. J. & O’Reilly, K. *The National Statistics Socio-economic*

- 623            *Classification: Origins, Development and Use.*
- 624            <https://www.researchgate.net/publication/312200977> (2005).
- 625    43.    Carstairs, V. & Morris, R. Deprivation and health in Scotland. *Health Bull.*  
626            (*Raleigh*). **48**, 162–75 (1990).
- 627    44.    Office of National Statistics. 2011 Census aggregate data.  
628            <https://www.ons.gov.uk/census/2011census> (2012).
- 629    45.    Luciana, M. & Nelson, C. A. Assessment of neuropsychological function  
630            through use of the Cambridge Neuropsychological Testing Automated Battery:  
631            Performance in 4- to 12-year-old children. *Dev. Neuropsychol.* **22**, 595–624  
632            (2002).
- 633    46.    Dumontheil, I. & Klingberg, T. Brain Activity during a Visuospatial Working  
634            Memory Task Predicts Arithmetical Performance 2 Years Later. *Cereb. Cortex*  
635            **22**, 1078–1085 (2012).
- 636    47.    Tombaugh, T. N. Trail Making Test A and B: Normative data stratified by age  
637            and education. *Arch. Clin. Neuropsychol.* **19**, 203–214 (2004).
- 638    48.    Burgess, P. W. Theory and methodology in executive function research. in  
639            *Methodology of Frontal and Executive Function* 79–113 (Taylor and Francis,  
640            2004). doi:10.4324/9780203344187-8.
- 641    49.    Goodman, R., Meltzer, H. & Bailey, V. The Strengths and Difficulties  
642            Questionnaire: a pilot study on the validity of the self-report version. *Int. Rev.*  
643            *Psychiatry* **15**, 173–177 (2003).
- 644    50.    The KIDSCREEN Group Europe. *The Kidscreen questionnaires—quality of life*  
645            *questionnaires for children and adolescents*. (Pabst Science Publishers, 2006).
- 646    51.    Berman, A. H., Liu, B., Ullman, S., Jadbäck, I. & Engström, K. Children’s

- 647 Quality of Life Based on the KIDSCREEN-27: Child Self-Report, Parent  
648 Ratings and Child-Parent Agreement in a Swedish Random Population  
649 Sample. *PLoS One* **11**, e0150545 (2016).
- 650 52. ESA. *Sentinel-2 User Handbook*. (2015).
- 651 53. Gascon, M. *et al.* Normalized difference vegetation index (NDVI) as a marker  
652 of surrounding greenness in epidemiological studies: The case of Barcelona  
653 city. *Urban For. Urban Green.* **19**, 88–94 (2016).
- 654 54. Gorelick, N. *et al.* Google Earth Engine: Planetary-scale geospatial analysis for  
655 everyone. *Remote Sens. Environ.* **202**, 18–27 (2017).
- 656 55. OS. *Open Map - Local*. <http://os.uk> (2019).
- 657 56. Miura, N. & Jones, S. D. Characterizing forest ecological structure using pulse  
658 types and heights of airborne laser scanning. *Remote Sens. Environ.* **114**,  
659 1069–1076 (2010).
- 660 57. Dadvand, P. *et al.* The association between greenness and traffic-related air  
661 pollution at schools. *Sci. Total Environ.* **523**, 59–63 (2015).
- 662 58. Sunyer, J. *et al.* Association between Traffic-Related Air Pollution in Schools  
663 and Cognitive Development in Primary School Children: A Prospective Cohort  
664 Study. *PLOS Med.* **12**, e1001792 (2015).
- 665 59. Rue, H., Martino, S. & Chopin, N. Approximate Bayesian inference for latent  
666 Gaussian models by using integrated nested Laplace approximations. *J. R.*  
667 *Stat. Soc. Ser. B (Statistical Methodol.* **71**, 319–392 (2009).
- 668 60. RStudio Team. RStudio: Integrated Development for R. RStudio. (2015).
- 669 ACKNOWLEDGEMENTS

670 We thank Professor Marta Blangiardo (Imperial College London) and Dr Rory Gibb  
671 (University College London) for feedback on the statistical analyses. This study is  
672 supported by funding of the London Natural Environment Research Council Doctoral  
673 Training Program (NE/L002485/1), the MRC Centre for Environment and Health  
674 (MR/L01341X/1) based at Imperial College London and the NIHR Health Protection  
675 Research Unit in the Health Impact of Environmental Hazards, based at King's  
676 College London and Imperial College London, in partnership with Public Health  
677 England (PHE) (HPRU-2012-10141). SCAMP is independent research funded by the  
678 National Institute for Health Research (NIHR) Policy Research Program (PRP)  
679 (Secondary School Cohort Study of Mobile Phone Use and Neurocognitive and  
680 Behavioural Outcomes/091/0212) via the Research Initiative on Health and Mobile  
681 Telecommunications, a partnership between public funders and the mobile phone  
682 industry. An extension to SCAMP is funded by NIHR PRP. The funders of the study  
683 had no role in the design or conduct of the study nor the reporting of the SCAMP  
684 study results. M.B.T. chair and the work in this paper is supported in part by a  
685 donation from Marit Mohn to Imperial College London to support Population Child  
686 Health. The views expressed in this paper are those of the authors and not  
687 necessarily those of the NIHR, DHSC, PHE or any other funder.

## 688 AUTHOR CONTRIBUTIONS

689 M.J.A.M., K.E.J. and M.T.B. conceived the study and analysed the results. E.B.  
690 provided data on cognitive development. M.J.A.M. coded the models, performed the  
691 simulations and wrote the manuscript with substantial contributions from all the  
692 authors.

693    **COMPETING INTERESTS**

694    The authors declare no competing interests.

695 FIGURES

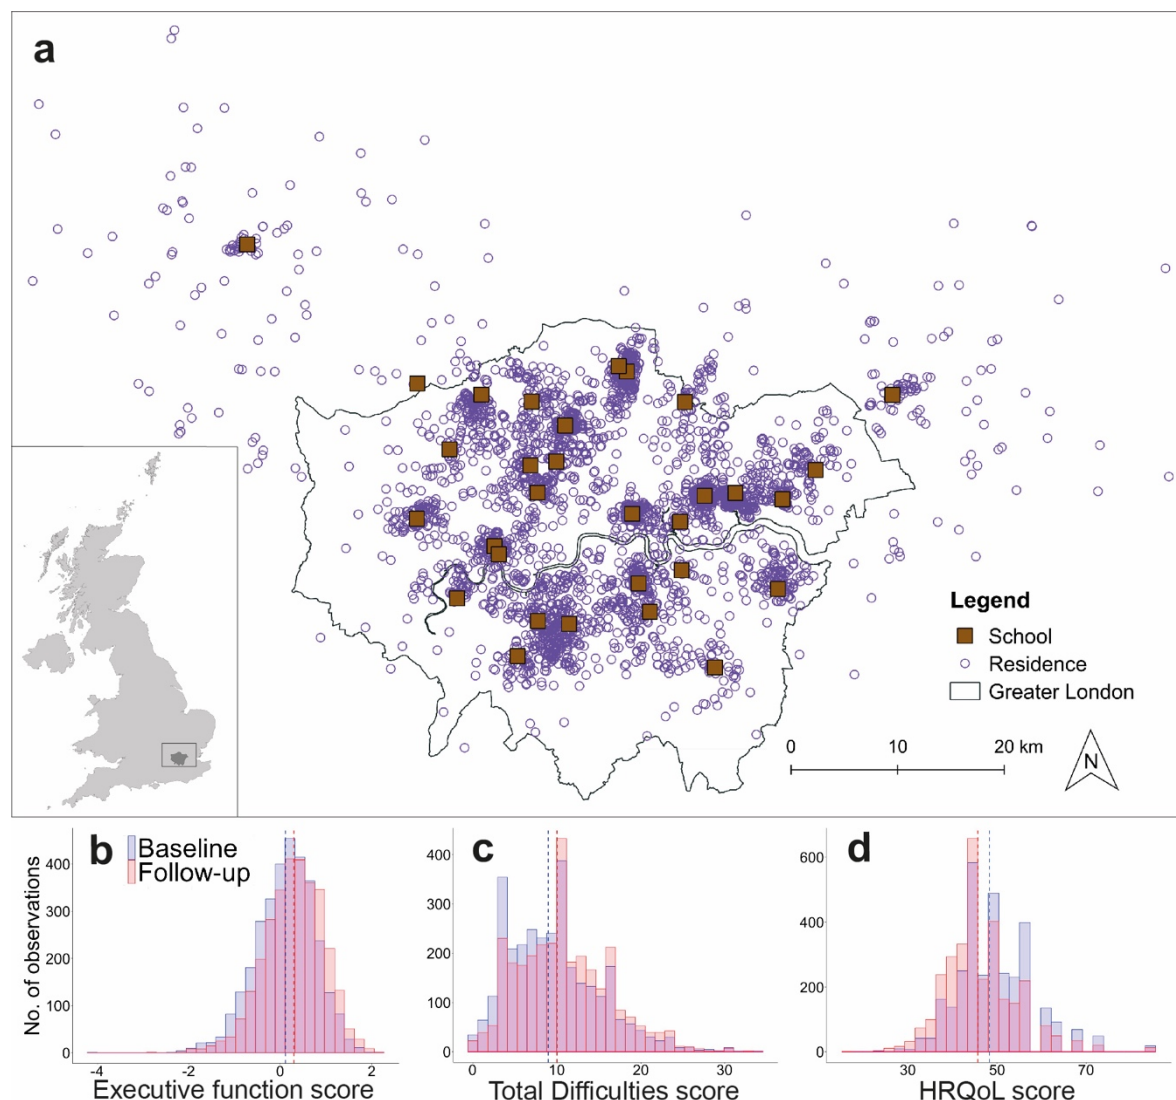

696

697 **Fig. 1. Geographic distribution of our longitudinal dataset and associated health variables for**  
698 **cognitive development and mental health.** (a) Geolocation of the 3,568 children with a known  
699 home address during the baseline and follow-up assessment of the Study of Cognition, Adolescents  
700 and Mobile Phones and the 31 participating schools across the London metropolitan area, United  
701 Kingdom. Histograms show our baseline (blue) and follow-up (red) outcome for cognitive  
702 development: (b) Executive function score, and our outcomes for mental health: (c) Strengths and  
703 Difficulties Questionnaire total difficulties score and (d) KIDSCREEN-10 Questionnaire Health-Related  
704 Quality of Life score. A dashed line marks the median (Q<sub>1</sub>-Q<sub>3</sub>) for our baseline and follow-up  
705 outcomes, i.e. for (b) baseline: 0.16 (-0.30, 0.56), follow-up: 0.33 (-0.10, 0.76), (c) baseline: 9 (6, 13),  
706 follow-up: 10 (7, 14) and (d) baseline: 48.28 (43.34, 53.10), follow-up: 45.66 (41.23, 49.76).



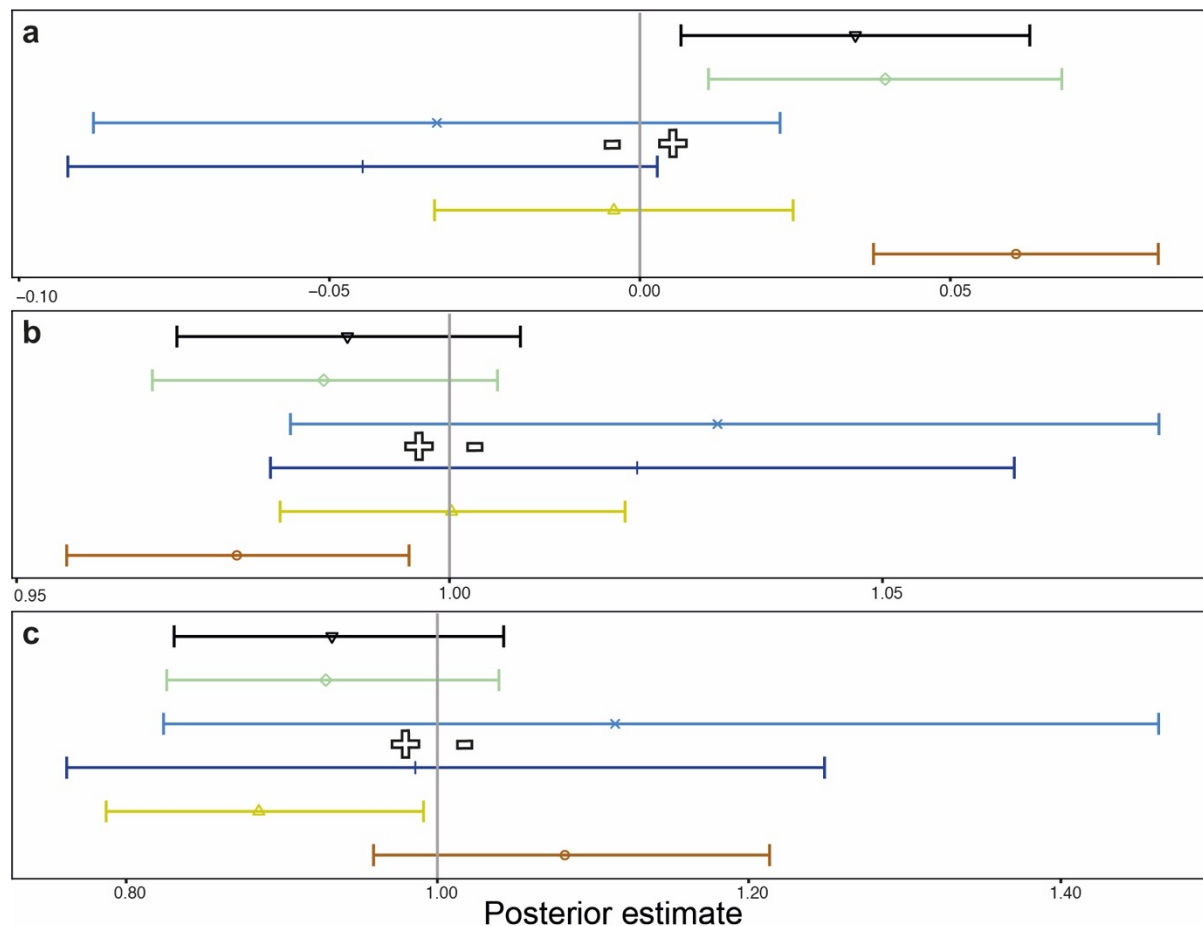

707

708 **Fig. 2. The associations between our natural habitat daily exposure rates (DER), and cognitive**  
 709 **development, mental health and overall well-being across London.** The association between (a)  
 710 executive function (EF) score, (b) Strengths and Difficulties Questionnaire total difficulties score and  
 711 (c) KIDSCREEN-10 Questionnaire Health-Related Quality of Life score with the DER of natural space  
 712 (◄), green space (◊), blue space level 2 (\*), blue space level 3 (+), grassland (▲) and  
 713 woodland (●). Fully adjusted model was plotted with posterior mean and 95% credible intervals (CI)  
 714 and included age, area-level deprivation, ethnicity, gender, parental occupation and school type.  
 715 Models with EF as the outcome were additionally adjusted for air pollution. The vertical line (grey) is  
 716 the reference line and is set to zero or one depending on the model used for the outcome in analysis.  
 717 Hollow plus or minus sign indicated whether the association had a positive or negative contribution to  
 718 cognitive development or mental health.
